# Supplementary material for: Quantification of a Sulfated Marine-Inspired Antifouling Compound in Several Aqueous Matrices: Biodegradation Studies and Leaching Assays from Polydimethylsiloxane Coatings
Source: MDPI journal article supplement (doi:10.3390/md20090548), 2022-08-25
Supplement: s1 [file s1]

## **Quantification of a sulfated marine inspired antifouling compound in several aqueous matrices: biodegradation studies and leaching assays from polydimethylsiloxane coatings**

**Cátia Vilas-Boas<sup>1,2</sup>, Virgínia Gonçalves<sup>3,4</sup>, Paolo De Marco<sup>3,4</sup>, Emília Sousa<sup>1,2</sup>, Madalena Pinto<sup>1,2</sup>, Elisabete R. Silva<sup>5,6</sup>, Maria Elizabeth Tiritan<sup>1,2,3,4,\*</sup> and Marta Correia-da-Silva<sup>1,2,\*</sup>**

<sup>1</sup> Laboratory of Organic and Pharmaceutical Chemistry, Department of Chemical Sciences, Faculty of Pharmacy, University of Porto, Rua Jorge Viterbo Ferreira, 228, 4050-313 Porto, Portugal

<sup>2</sup> CIIMAR/CIMAR— Interdisciplinary Center for Marine and Environmental Research, University of Porto, Avenida General Norton de Matos, 4450-208 Matosinhos, Portugal

<sup>3</sup> UNIPRO – Oral Pathology and Rehabilitation Research Unit, University Institute of Health Sciences (IUCS), CESPU, 4585-116 Gandra, Portugal

<sup>4</sup> TOXRUN – Toxicology Research Unit, University Institute of Health Sciences, CESPU, CRL, Gandra, 4585-116, Portugal

<sup>5</sup> BioISI-Biosystems & Integrative Sciences Institute, Faculdade de Ciências, Universidade de Lisboa, 1749-016 Lisboa, Portugal

<sup>6</sup> CERENA-Centro de Recursos Naturais e Ambiente, Instituto Superior Técnico, Universidade de Lisboa, 1049-001 Lisboa, Portugal

\* Correspondence: beth@ff.up.pt (M.E.T.); m\_correiasilva@ff.up.pt (M.C.-d.-S.)

## Index

|                                                                                                                                                            |   |
|------------------------------------------------------------------------------------------------------------------------------------------------------------|---|
| Figure S1. Representative chromatogram of GAP-standard solution (500 $\mu\text{M}$ ) in natural seawater (NSW) with several mobile phases proportions..... | 3 |
| Figure S2. Representative chromatogram of GAP-standard solution (500 $\mu\text{M}$ ) in natural seawater (NSW) with several column temperatures.....       | 3 |
| Figure S3. Representative chromatogram of standard solutions of GAP (30-600 $\mu\text{M}$ ) in ultra-pure water (UPW).....                                 | 4 |
| Figure S4. Representative chromatogram of standard solutions of GAP (30-600 $\mu\text{M}$ ) in natural seawater (NSW).....                                 | 4 |

## Chromatographic analysis of GAP

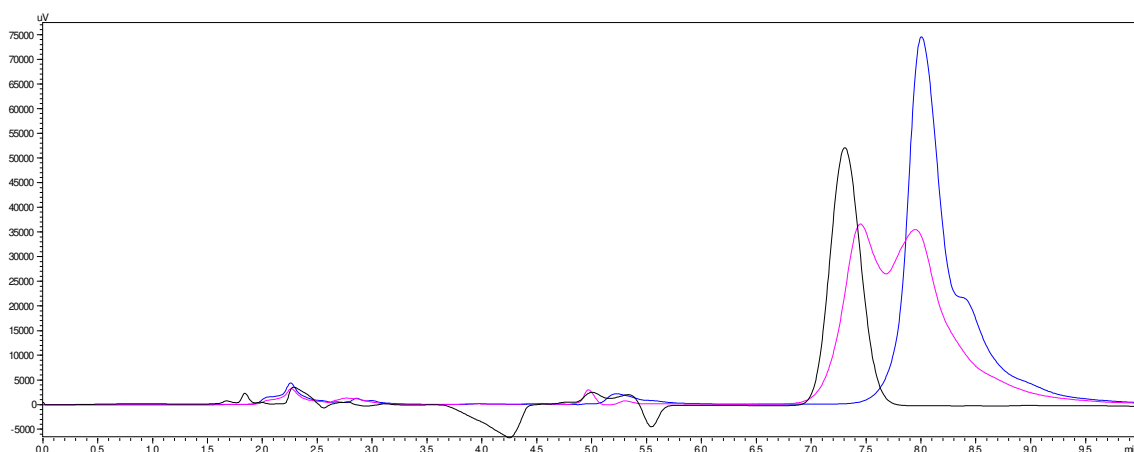

**Figure S1.** Representative HPLC chromatogram of GAP-standard solution (500  $\mu$ M) in natural seawater (NSW), diluted 1:1 before injection with acetonitrile and several proportions of acetonitrile: 20 mM aqueous ammonium acetate as mobile phase, namely (78:22 v/v, black line), (50:50 v/v, pink line), and (80:20 v/v, blue line); flow rate at 0.8 mL/min; column: INERTSIL HILIC (3  $\mu$ m, 150  $\times$  4.6 mm); detection  $\lambda_{\text{max}}$  =236 nm.

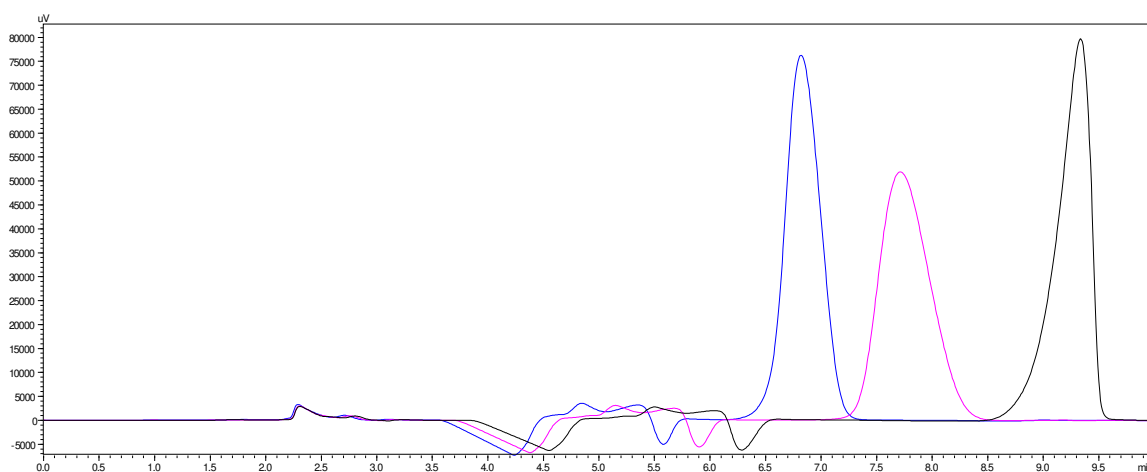

**Figure S2.** Representative HPLC chromatogram of GAP-standard solution (500  $\mu$ M) in natural seawater (NSW), diluted 1:1 before injection with acetonitrile and several column temperatures (28  $^{\circ}$ C, blue line), (25  $^{\circ}$ C, pink line), (22  $^{\circ}$ C, black line); Mobile phase: acetonitrile: 20 mM aqueous ammonium acetate (78:22 v/v) with; flow rate at 0.8 mL/min; column: INERTSIL HILIC (3  $\mu$ m, 150  $\times$  4.6 mm); detection  $\lambda_{\text{max}}$  =236 nm.

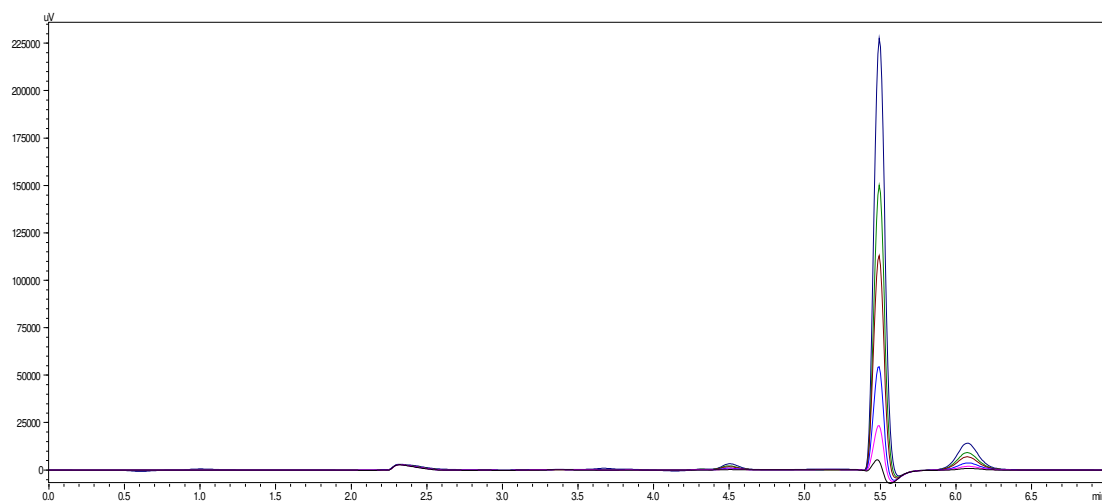

**Figure S3.** Representative HPLC chromatogram of standard solutions of GAP (30-600  $\mu\text{M}$ ) in ultra-pure water (UPW), diluted 1:1 before injection with acetonitrile. Mobile phase: acetonitrile: 20 mM aqueous ammonium acetate (78:22 v/v) with; flow rate at 0.8 mL/min; column: INERTSIL HILIC (3  $\mu\text{m}$ , 150  $\times$  4.6 mm) at 28  $^{\circ}\text{C}$ ; detection  $\lambda_{\text{max}}$  =236 nm.

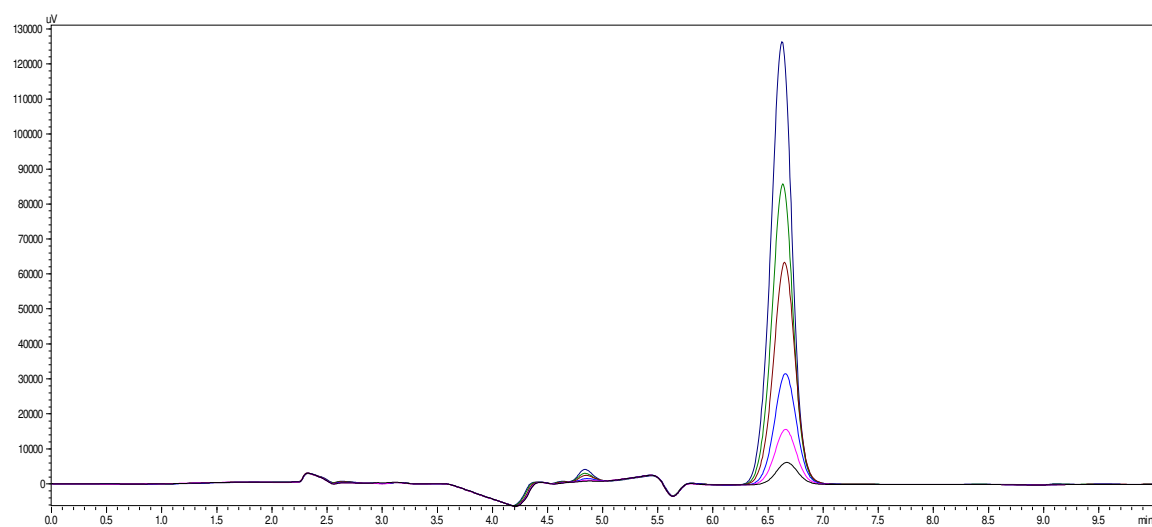

**Figure S4.** Representative HPLC chromatogram of standard solutions of GAP (30-600  $\mu\text{M}$ ) in natural seawater (NSW), diluted 1:1 before injection with acetonitrile. Mobile phase: acetonitrile: 20 mM aqueous ammonium acetate (78:22 v/v) with; flow rate at 0.8 mL/min; column: INERTSIL HILIC (3  $\mu\text{m}$ , 150  $\times$  4.6 mm) at 28  $^{\circ}\text{C}$ ; detection  $\lambda_{\text{max}}$  =236 nm.
